1        A high density linkage map reveals sexual dimorphism in  
2        recombination landscapes in red deer (*Cervus elaphus*).

3        Susan E. Johnston, Jisca Huisman, Philip A. Ellis and Josephine M. Pemberton

4        Institute of Evolutionary Biology, University of Edinburgh, Edinburgh, EH9 3FL, United Kingdom.

5        Corresponding author: Susan.Johnston@ed.ac.uk

## 6 **Abstract**

7 High density linkage maps are an important tool to gain insight into the genetic architecture of  
8 traits of evolutionary and economic interest, and provide a resource to characterise variation  
9 in recombination landscapes. Here, we used information from the cattle genome and the 50K  
10 Cervine Illumina BeadChip to inform and refine a high density linkage map in a wild population  
11 of red deer (*Cervus elaphus*). We constructed a predicted linkage map of 38,038 SNPs and a  
12 skeleton map of 10,835 SNPs across 34 linkage groups. We identified several chromosomal  
13 rearrangements in the deer lineage relative to sheep and cattle, including six chromosome fis-  
14 sions, one fusion and two large inversions. Otherwise, our findings showed strong concordance  
15 with map orders in the cattle genome. The sex-averaged linkage map length was 2739.7cM  
16 and the genome-wide autosomal recombination rate was 1.04cM per Mb. The female autoso-  
17 mal map length was 1.21 longer than that of males (2767.4cM vs 2280.8cM, respectively). Sex  
18 differences in map length were driven by high female recombination rates in peri-centromeric  
19 regions, a pattern that is unusual relative to other mammal species. This effect was more  
20 pronounced in fission chromosomes that would have had to produce new centromeres. We  
21 propose two hypotheses to explain this effect: (1) that this mechanism may have evolved to  
22 counteract centromeric drive associated with meiotic asymmetry in oocyte production; and/or  
23 (2) that sequence and structural characteristics suppressing recombination in close proximity  
24 to the centromere may not have yet evolved at neo-centromeres. Our study provides insight  
25 into how recombination landscapes vary and evolve in mammals, and will provide a valuable

26 resource for studies of evolution, genetic improvement and population management in red deer  
27 and related species.

## 28 Article Summary

29 We present a high density linkage map (>38,000 markers) in a wild population of Red deer  
30 (*Cervus elaphus*). Our investigation of the recombination landscape showed a marked differ-  
31 ence in recombination rates between the sexes in proximity to the centromere, with females  
32 showing an unusually elevated rate relative to other mammal species. This effect is most pro-  
33 nounced in chromosomes that would have produced a new centromere in the deer lineage. We  
34 propose that the observed effects have evolved to counteract selfish genetic elements associ-  
35 ated with asymmetrical female meiosis.

## 36 Introduction

37 The advent of affordable next-generation sequencing and SNP-typing assays allows large num-  
38 bers of polymorphic genetic markers to be characterised in almost any system. A common chal-  
39 lenge is how to organise these genetic variants into a coherent order for downstream analyses,  
40 as many approaches rely on marker order information to gain insight into genetic architectures  
41 and evolutionary processes (Ellegren, 2014). Linkage maps are often an early step in this pro-  
42 cess, using information on recombination fractions between markers to group and order them  
43 on their respective chromosomes (Sturtevant, 1913; Lander and Schork, 1994). Ordered mark-  
44 ers have numerous applications, including: trait mapping through quantitative trait locus (QTL)  
45 mapping, genome-wide association studies (GWAS) and regional heritability analysis (Bérénos  
46 *et al.*, 2015; Fountain *et al.*, 2016); genome-scans for signatures of selection and population  
47 divergence (Bradbury *et al.*, 2013; McKinney *et al.*, 2016); quantification of genomic inbreeding  
48 through runs of homozygosity (Kardos *et al.*, 2016); and comparative genomics and genome  
49 evolution (Brieuc *et al.*, 2014; Leitwein *et al.*, 2016). Linkage maps also provide an important  
50 resource in *de novo* genome assembly, as they provide information for anchoring sequence  
51 scaffolds and allow prediction of gene locations relative to better annotated species (Fierst,  
52 2015).

53 One application of high density linkage maps is the investigation of variation in contemporary  
54 recombination landscapes. Meiotic recombination is essential for proper disjunction in many  
55 species (Hassold and Hunt, 2001; Fledel-Alon *et al.*, 2009); it also generates new allelic combi-  
56 nations upon which selection can act, and prevents the accumulation of deleterious mutations  
57 (Muller, 1964; Felsenstein, 1974; Charlesworth and Barton, 1996). Linkage maps have shown  
58 that recombination rates can vary within and between chromosomes, populations and species  
59 in a wide variety of taxa (Stapley *et al.*, 2008; Kawakami *et al.*, 2014; Smukowski and Noor,  
60 2011). One striking observation is that sex is consistently one of the strongest correlates with  
61 recombination rate and landscape variation. The direction and degree of sex differences in re-  
62 combination, known as “heterochiasmy”, can differ over relatively short evolutionary timescales,  
63 and whilst broad trends have been observed (e.g. increased recombination in females), many  
64 exceptions remain (Lenormand and Dutheil, 2005; Brandvain and Coop, 2012). Theoretical ex-  
65 planations for the evolution of heterochiasmy include haploid selection, sex-specific selection  
66 and sperm competition (Lenormand and Dutheil, 2005; Trivers, 1988; Burt, 2000), but empirical  
67 support for each of these theories had been limited (Mank, 2009). One emerging hypothesis  
68 is the role of meiotic drive, where asymmetry in cell division during oogenesis can be exploited  
69 by selfish genetic elements (i.e. variants which enhance their own transmission relative to the  
70 rest of the genome) associated with centromere “strength” (Brandvain and Coop, 2012). Strong  
71 centromeres have increased levels of kinetochore proteins, and will preferentially be drawn to  
72 one pole of the oocyte, which will become an egg or a polar body, resulting in biased transmis-  
73 sion at the stronger/weaker centromere, respectively (Pardo-Manuel De Villena and Sapienza,  
74 2001; Chmátal *et al.*, 2014). Theoretical work has shown that higher female recombination at  
75 centromeric regions may counteract drive by increasing the uncertainty at which linked genomic  
76 regions segregate into the egg (Haig and Grafen, 1991). As linkage map data for non-model  
77 species continues to proliferate, it is now increasingly possible to investigate the key hypotheses  
78 for recombination rate variation and heterochiasmy in a wider variety of taxa.

79 Nevertheless, creating linkage maps of many thousands of genome-wide markers *de novo* is  
80 a computationally intensive process requiring pedigree information, sufficient marker densities  
81 over all chromosomes and billions of locus comparisons. Furthermore, the ability to create a  
82 high resolution map is limited by the number of meioses in the dataset; as marker densities  
83 increase, more individuals are required to resolve genetic distances between closely linked  
84 loci (Kawakami *et al.*, 2014). Whilst *de novo* linkage map assembly with large numbers of  
85 SNPs is possible (Rastas *et al.*, 2016), one approach to ameliorate the computational cost and

86 map resolution is to use genome sequence data from related species to inform initial marker  
87 orders. Larger and finer scale rearrangements can then be refined through further investigation  
88 of recombination fractions between markers.

89 In this study, we use this approach to construct a high density linkage map in a wild population  
90 of red deer (*Cervus elaphus*). The red deer is a large deer species widely distributed across  
91 the northern hemisphere, and is a model system for sexual selection and behaviour (Clutton-  
92 Brock *et al.*, 1982; Kruuk *et al.*, 2002), hybridisation (Senn and Pemberton, 2009), inbreeding  
93 (Huisman *et al.*, 2016) and population management (Frantz *et al.*, 2006). They are also an  
94 increasingly important economic species farmed for venison, antler velvet products and trophy  
95 hunting (Brauning *et al.*, 2015). A medium density map (~600 markers) is available for this  
96 species, constructed using microsatellite, RFLP and allozyme markers in a red deer × Père  
97 David's deer (*Elaphurus davidianus*) F<sub>2</sub> cross (Slate *et al.*, 2002). However, these markers  
98 have been largely superseded by the development of a Cervine Illumina BeadChip which char-  
99 acterises 50K SNPs throughout the genome (Brauning *et al.*, 2015). SNP positions were initially  
100 assigned relative to the cattle genome, but the precise order of SNPs in red deer remains un-  
101 known. Here, we integrate pedigree and SNP data from a long-term study of wild red deer on  
102 the island of Rum, Scotland to construct a predicted linkage map of ~ 38,000 SNP markers  
103 and a “skeleton” linkage map of ~11,000 SNP markers that had been separated by at least one  
104 meiotic crossover. As well as identifying strong concordance with the cattle genome and sev-  
105 eral chromosomal rearrangements, we also present evidence of strong female-biased recom-  
106 bination rates at peri-centromeric regions of the genome which is more pronounced in fission  
107 chromosomes that would have had to produced new centromeres. We discuss the implications  
108 of our findings for other linkage mapping studies, and the potential drivers of recombination rate  
109 variation and sexual dimorphism of this trait within this system.

## 110 **Materials and Methods**

### 111 **Study Population and SNP dataset.**

112 The red deer population is located in the North Block of the Isle of Rum, Scotland (57°02'N,  
113 6°20'W) and has been subject to an on-going individual-based study since 1971 (Clutton-Brock

114 *et al.*, 1982). Research was conducted following approval of the University of Edinburgh's An-  
115 imal Welfare and Ethical Review Body and under appropriate UK Home Office licenses. DNA  
116 was extracted from neonatal ear punches, post-mortem tissue, and cast antlers (see Huisman  
117 *et al.*, 2016 for full details). DNA samples from 2880 individuals were genotyped at 50,541  
118 SNP loci on the Cervine Illumina BeadChip (Brauning *et al.*, 2015) using an Illumina genotyp-  
119 ing platform (Illumina Inc., San Diego, CA, USA). SNP genotypes were scored using Illumina  
120 GenomeStudio software, and quality control was carried out using the *check.marker* function in  
121 GenABEL v1.8-0 (Aulchenko *et al.*, 2007) in R v3.3.2, with the following thresholds: SNP geno-  
122 typing success >0.99, SNP minor allele frequency >0.01, and ID genotyping success >0.99. A  
123 total of 38,541 SNPs and 2,631 IDs were retained. The function identified 126 pseudoautosomal  
124 SNPs on the X chromosome (i.e. markers showing autosomal inheritance patterns). Any  
125 heterozygous genotypes at non-pseudoautosomal X-linked SNPs within males were scored as  
126 missing. A pedigree of 4,515 individuals has been constructed using microsatellite and SNP  
127 data using the software Sequoia (Huisman, 2017; see Huisman *et al.*, 2016 for information on  
128 deer pedigree construction).

## 129 **Linkage map construction.**

130 A standardised sub-pedigree approach was used for linkage map construction (Johnston *et al.*,  
131 2016). The pedigree was split as follows: for each link between a focal individual (FID) and  
132 an offspring, a sub-pedigree was constructed that included the FID, its parents, the offspring,  
133 and the other parent of the offspring (Figure 1), and were retained where all five individuals  
134 were SNP genotyped. This pedigree structure characterises crossovers occurring in the ga-  
135 mete transferred from the FID to that offspring. In cases where an individual had more than  
136 one offspring, an individual pedigree was constructed for each FID - offspring relationship. A  
137 total of 1355 sub-pedigrees were constructed, allowing characterisation of crossovers in ga-  
138 metes transmitted to 488 offspring from 83 unique males and 867 offspring from 259 unique  
139 females. Linkage mapping was conducted using an iterative approach using the software CRI-  
140 MAP v2.504a (Green *et al.*, 1990), with input and output processing carried out using the R  
141 package *crimaptools* v0.1 (S.E.J., available <https://github.com/susjoh/crimaptools>) implemented  
142 in R v3.3.2. In all cases, marker order was specified in CRI-MAP based on the criteria outlined  
143 in each section below. In order to ensure that sex-differences in map lengths are not due to the  
144 over-representation of female meioses in the dataset, maps were reconstructed for ten subsets

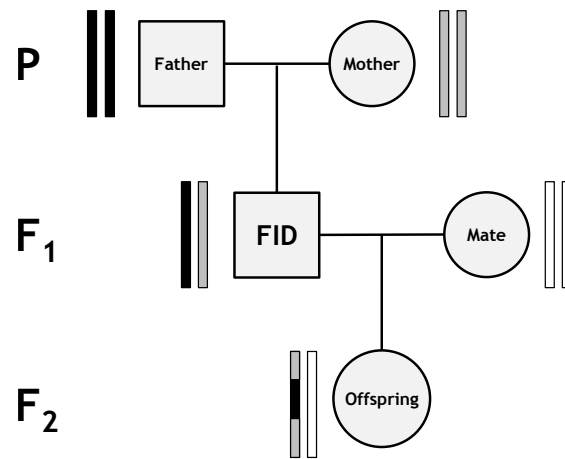

**Figure 1:** Sub-pedigree structure used to construct linkage maps. Rectangle pairs next to each individual represent chromatids, with black and grey shading indicating chromosome or chromosome sections of FID paternal and FID maternal origin, respectively. White shading indicates chromatids for which the origin of SNPs cannot be determined. Crossovers in the gamete transferred from the focal individual (FID) to its offspring (indicated by the grey arrow) can be distinguished at the points where origin of alleles origin flips from FID paternal to FID maternal and vice versa. From Johnston *et al.* (2016).

145 of 483 male and 483 female FID-offspring pairs randomly sampled with replacement from the  
146 dataset.

147 **Build 1: Order deer SNPs based on synteny with cattle genome.** Mendelian incompati-  
148 bilities were identified using the CRI-MAP *prepare* function, and incompatible genotypes were  
149 removed from both parents and offspring. SNPs with Mendelian error rates of  $>0.01$  were dis-  
150 carded (N = 0 SNPs). Sub-pedigrees with more than 50 Mendelian errors between an FID  
151 and its offspring were also discarded (N = 4). All SNPs were named based on direct synteny  
152 with the cattle genome (BTA vUMD 3.0; N = 30). Therefore, loci were ordered and assigned to  
153 linkage groups assuming the cattle order, and a sex-averaged map of each chromosome was  
154 constructed using the CRI-MAP *chrompic* function (N = 38,261 SNPs, Figure S1).

155 **Build 2: Rerun cattle order with wrongly positioned chunks removed.** All SNP loci from  
156 Build 1 were assigned to “chunks”, defined as a run of SNPs flanked by map distances of  $\geq 3$   
157 centiMorgans (cM). Several short chunks were flanked by large map distances, indicating that  
158 they were wrongly positioned in Build 1 (Figure S1); chunks containing  $<20$  SNPs were removed  
159 from the analysis for Build 2 (N = 327 SNPs). A sex-averaged map of each chromosome was  
160 reconstructed using the *chrompic* function (N = 37,934 SNPs, Figure S2).

161 **Build 3: Arrange chunks into deer linkage groups.** SNPs from Build 2 were arranged into  
162 34 deer linkage groups (hereafter prefixed with CEL) based on a previous characterisation of  
163 fissions and fusions from the red deer  $\times$  Père David's deer linkage map (Slate *et al.*, 2002)  
164 and visual inspection of linkage disequilibrium (LD,  $R^2$ , calculated using the *r2fast* function in  
165 GenABEL; Figure S3). At this stage, the orientation of linkage groups was made to match that  
166 of the Slate *et al.* publication. There was strong conformity with fissions and fusions identified  
167 in the previous deer map (Table 1); intra-marker distances of  $\sim 100$  cM between long chunks  
168 indicated that they segregated as independent chromosomes. In Build 2, chunks flanked by  
169 gaps of  $\ll 100$  cM but  $> 10$  cM were observed on the maps associated with BTA13 (CEL23) and  
170 BTA28 (CEL15; Figure S2). Visual inspection of LD indicated that these chunks were incorrectly  
171 orientated segments of  $\sim 10.5$  and  $\sim 24.9$  cM in length, respectively (Figure S3a and S3b; Table  
172 1). Reversal of marker orders in these regions resulted in map length reductions of 19.4 cM and  
173 20.9 cM, respectively. Visual inspection of LD also confirmed fission of CEL19 and CEL31 (syn-  
174 tenic to BTA1), with a 45.4 cM inversion on CEL19 (Figure S3c). The X chromosome (BTA30,  
175 CEL34) in Build 2 was more fragmented, comprising 9 large chunks (Figure S4). Visual inspec-  
176 tion of LD in females indicated that chunks 3 and 7 occurred at the end of the chromosome,  
177 and that chunks 4, 5 and 6 were wrongly-oriented (Figure S5). After rearrangement into new  
178 marker orders, a sex-averaged map of each deer linkage group was reconstructed using the  
179 *chrompic* function ( $N = 37,932$  SNPs, Figure S6).

180 **Build 4: Solve minor local re-arrangements.** Runs of SNPs from Build 3 were re-assigned  
181 to new chunks flanked by map distances of  $\geq 1$  cM. Maps were reconstructed to test whether  
182 inverting chunks of  $< 50$  SNPs in length and/or the deletion of chunks of  $< 10$  SNPs in length  
183 led to decreases in map lengths by  $\geq 1$  cM. One wrongly-orientated chunk of 25 SNPs was  
184 identified on CEL15 (homologous to part of the inversion site identified on BTA28 in Build 3),  
185 and the marker order was amended accordingly (reducing the map length from 101.4 cM to 98.1  
186 cM). Three chunks on the X chromosome (CEL34) shortened the map by  $\geq 1$  cM when inverted  
187 and were also amended accordingly, reducing the X-chromosome map by 10.8 cM relative to  
188 Build 3. The deletion of 35 individual SNPs on 14 linkage groups shortened their respective  
189 linkage maps by between 1 cM and 6.3 cM. A sex-averaged map of each deer linkage group  
190 was reconstructed using the *chrompic* function ( $N = 37,897$  SNPs, Figure S7).



191 **Build 5: Determining the location of unmapped markers and resolving phasing errors.**

192 In Builds 1 to 4, 372 SNPs in 89 chunks were removed from the analysis. To determine their  
193 likely location relative to the Build 5 map, LD was calculated between each unmapped SNP and  
194 all other SNPs in the genome to identify its most likely linkage group. The CRI-MAP *chrompic*  
195 function provides information on SNP phase (i.e. where the grandparent of origin of the allele  
196 could be determined) on chromosomes transmitted from the FID to offspring. The correlation  
197 between allelic phase was calculated for each unmapped marker and all markers within a 120  
198 SNP window around its most likely position. A total 186 SNPs in 18 chunks could be unambigu-  
199 ously mapped back to the genome; for all other markers, their most likely location was defined  
200 as the range in which the correlation of allelic phase with mapped markers was  $\geq 0.9$  (Adjusted  
201  $R^2$ ). A provisional sex-averaged map of each deer linkage group was reconstructed using the  
202 *chrompic* function (N = 38,083 SNPs). Marker orders were reversed on the deer fission linkage  
203 groups 6, 8, 16, 22 and 31 to match the orientation of the cattle genome.

204 Errors in determining the phase of alleles can lead to incorrect calling of double crossovers (i.e.  
205 two or more crossovers occurring on the same chromosome) over short map distances, leading  
206 to errors in local marker order. To reduce the likelihood of calling false double crossover events,  
207 runs of grandparental origin consisting of a single SNP (resulting in a false double crossover  
208 across that SNP) were recoded as missing (Figure S8) and the *chrompic* function was rerun. Of  
209 the remaining double crossovers, those occurring over distances of  $\leq 10\text{cM}$  (as measured by  
210 the distance between markers immediately flanking the double crossover) were also recoded  
211 as missing. Our justification is that the majority of crossovers captured should be subject to  
212 some degree of crossover interference (i.e. Class I crossovers; Phadnis *et al.*, 2011); for the  
213 purposes of creating a broad-scale map, we have removed any crossovers that may not have  
214 been subject to interference and inflate map distances in this dataset. Finally, sex-averaged  
215 and sex-specific maps of each deer linkage group were reconstructed using the *chrompic* and  
216 *map* functions (Figure 2, Figure S9).

217 **Build 6: Building a skeleton map and testing fine-scale order variations.**

218 In Build 5, 71.6%  
219 of intra-marker distances were 0cM; therefore, a “skeleton map” was created to examine local  
220 changes in marker orders. All runs of SNPs were re-assigned to new chunks where all SNPs  
221 mapped to the same cM position; of each chunk, the most phase-informative SNP was identified  
from the *.loc* output from the CRI-MAP *prepare* function (N = 10,835 SNPs). The skeleton



222 map was split into windows of 100 SNPs with an overlap of 50 SNPs, and the CRI-MAP *flips*  
223 function was used to test the likelihood of marker order changes of 2 to 5 adjacent SNPs (*flips2*  
224 to *flips5*). Rearrangements improving the map likelihood by >2 would have been investigated  
225 further; however, no marker rearrangement passed this threshold and so the Build 5 map was  
226 assumed to be the most likely map order (Map provided in Table S1).

## 227 **Determining the lineage of origin of chromosome rearrangements.**

228 Lineage of origin and/or verification of potential chromosomal rearrangements was attempted  
229 by aligning SNP flanking sequences (as obtained from Brauning *et al.*, 2015) to related genome  
230 sequences using BLAST v2.4.0+ (Camacho *et al.*, 2009). Cattle and sheep diverged from deer  
231  $\sim 27.31$  Mya, and diverged from each other  $\sim 24.6$  Mya (Hedges *et al.*, 2015); therefore,  
232 rearrangements were assumed to have occurred in the lineage that differed from the other two.  
233 Alignments were made to cattle genome versions vUMD3.0 and Btau\_4.6.1, and to the sheep  
234 genome Oar\_v3.1 using default parameters in *blastn*, and the top hit was retained where  $\geq$   
235 85% of bases matched over the informative length of the SNP flanking sequence.

## 236 **Variation in recombination rate and landscape.**

237 Estimated genomic positions were calculated for each SNP based on the differences between  
238 the cattle base pair position of sequential markers. At the boundaries of rearrangements, the  
239 base pair difference between markers was estimated assuming that map distances of 1cM  
240 were equivalent to 1 megabase (Mb). The first SNP on each linkage group was given the mean  
241 start position of all cattle chromosomes. Estimated genomic positions are given in Table S1.  
242 The relationship between linkage map and estimated chromosome lengths for each sex were  
243 estimated using linear regression in R v3.3.2.

244 To investigate intra-chromosomal variation in recombination rates, the probability of crossing  
245 over was determined within 1 Mb windows using the estimated genomic positions, starting with  
246 the first SNP on the chromosome. This was calculated as the sum of recombination fractions  
247  $r$  within the window; the  $r$  between the first and last SNPs and each window boundary was  
248 calculated as  $r \times N_{boundary} / N_{adjSNP}$ , where  $N_{boundary}$  is the number of bases to the window  
249 boundary and  $N_{adjSNP}$  is the number of bases to the adjacent window SNP. Windows with

250 recombination rates in the top 1 percentile after accounting for chromosome size were removed,  
251 as very high recombination rates may indicate map misassembly and/or underestimation of  
252 physical distances. All deer chromosomes are acrocentric, with the exception of one unknown  
253 autosome (Gustavsson and Sundt, 1968). The Build 5 linkage groups maps were orientated in  
254 the same direction as the cattle genome, and so we assumed that centromere positions in deer  
255 were at the start of the chromosome, as in cattle (Band *et al.*, 2000; Ma *et al.*, 2015).

256 In fission events, assuming no change in the original centromere position, one fission chro-  
257 mosome would have retained the centromere (in this case, CEL3, 17, 28, 29, 31 and 33),  
258 whereas the other would have had to have formed a new centromere (CEL22, 6, 26, 16, 19 and  
259 8, respectively). As all acrocentric chromosomes showed a consistently high recombination  
260 rate around the female centromere (see Results), we assumed that neo-centromeres had posi-  
261 tioned themselves at the beginning of these chromosomes. We defined chromosome histories  
262 as follows: those with fissions retaining the old centromere; fissions that would have formed a  
263 new centromere; and chromosomes with no fission or fusion relative to sheep/cattle lineages.  
264 Comparison of recombination landscapes between chromosomes of different histories was car-  
265 ried out using general additive models (GAM) from 0Mb (centromere) to 40Mb, specifying  $k =$   
266 10, using the R library *mgcv* v1.8-15 (Wood, 2011) implemented in R v3.3.2. Recombination  
267 rates within each bin were adjusted for chromosome size by dividing the bin rates by the overall  
268 chromosome recombination rate (cM/Mb) for each sex. As these chromosome comparisons  
269 have a relatively small sample size ( $n = 32$ ), the GAM analysis was repeated (a) excluding  
270 each chromosome and (b) excluding two chromosomes in turn, in order to determine whether  
271 the observed effect was driven by one or two chromosomes, respectively. As chromosome  
272 sizes are markedly different between fissions retaining a centromere and those forming a new  
273 centromere (see Figure S10), comparisons were also made between new centromere chro-  
274 mosomes and unchanged chromosomes of similar size (in this case, CEL6, 8, 16, 22 and 26 vs.  
275 CEL2, 7, 10, 24, 27 and 32).

## 276 **Transmission distortion.**

277 We conducted a preliminary analysis to identify regions of the genome associated with trans-  
278 mission distortion in the red deer pedigree. Specifically, we wished to determine if regions in  
279 close proximity to centromeres had biased transmission, which if occurring close to centromeric

280 regions, may indicate differences in centromere strength in the contemporary pedigree. At a  
281 given locus, the specific allele transmitted from an FID to a given offspring can be identified  
282 in cases where the FID is heterozygous and its mate is homozygous. For each locus per FID  
283 sex, an exact binomial test was used to determine whether the transmission frequency of allele  
284 A relative to allele B was significantly different from that expected due to chance. The associ-  
285 ated P values were transformed to follow an approximate normal distribution using the equation  
286  $\sqrt{-\log_{10} P}$ , and each SNP locus was assigned to a 1Mb bin. General linear models were run  
287 in males and females separately for the 10Mb interval in closest proximity to the centromere on  
288 all acrocentric chromosomes, including an interaction term between chromosome history and  
289 bin identity.

## 290 **Data availability**

291 The Supplemental Material contains information on additional analyses conducted and is refer-  
292 enced within the text. Table S1 contains the full red deer linkage maps for both sexes, including  
293 estimated Mb positions and information on marker informativeness. Table S2 contains compar-  
294 isons of red deer linkage map positions with cattle and sheep genomes for the X chromosome.  
295 Table S3 contains the approximate positions of unmapped loci. Table S4 contains the probabilit-  
296 ities of crossing over within 1Mb windows in both sexes. Table S5 contains BLAST results to  
297 determine lineage of origin of chromosome rearrangements. Table S6 contains the per-locus  
298 results for the transmission distortion analysis. Raw data, supplementary tables, and sequence  
299 information is publicly archived at doi:10.6084/m9.figshare.5002562. Code for the analysis is  
300 archived at <https://github.com/susjoh/DeerMapv4>.

**Table 1:** Synteny between the cattle and deer genomes. Large-scale fissions and fusions are informed by Slate *et al.* 2002 and confirmed in this study through sequence alignment (Table S5). † Indicates where fission chromosomes would have had to have formed a new centromere.

| Deer Linkage Group (CEL) | Cattle Chr (BTA) | Sheep Chr (OAR) | Notes                                                                                                                                                                                                              |
|--------------------------|------------------|-----------------|--------------------------------------------------------------------------------------------------------------------------------------------------------------------------------------------------------------------|
| 1                        | 15               | 15              |                                                                                                                                                                                                                    |
| 2                        | 29               | 21              |                                                                                                                                                                                                                    |
| 3                        | 5                | 3*              | Fission from CEL22 in deer lineage.                                                                                                                                                                                |
| 4                        | 18               | 14              |                                                                                                                                                                                                                    |
| 5                        | 17, 19           | 17, 11          | Fusion of BTA17 (OAR17) & BTA19 (OAR11) in deer lineage. Likely to be the metacentric chromosome in deer.                                                                                                          |
| 6                        | 6                | 6               | Fission from CEL17 in deer lineage. †                                                                                                                                                                              |
| 7                        | 23               | 20              |                                                                                                                                                                                                                    |
| 8                        | 2                | 2*              | Fission from CEL33 in deer lineage. †                                                                                                                                                                              |
| 9                        | 7                | 5               |                                                                                                                                                                                                                    |
| 10                       | 25               | 24              |                                                                                                                                                                                                                    |
| 11                       | 11               | 3*              |                                                                                                                                                                                                                    |
| 12                       | 10               | 7               |                                                                                                                                                                                                                    |
| 13                       | 21               | 18              |                                                                                                                                                                                                                    |
| 14                       | 16               | 12              |                                                                                                                                                                                                                    |
| 15                       | 26, 28           | 22, 25          | Fission into BTA26 (OAR22) & BTA28 (OAR25) in the early cattle/sheep lineage (Slate <i>et al.</i> , 2002). On segment syntenic with BTA28, ~13Mb inversion in deer lineage and ~1.5Mb inversion in cattle lineage. |
| 16                       | 8                | 2*              | Fission from CEL29 in deer lineage. †                                                                                                                                                                              |
| 17                       | 6                | 6               | Fission from CEL6 in deer lineage.                                                                                                                                                                                 |
| 18                       | 4                | 4               |                                                                                                                                                                                                                    |
| 19                       | 1                | 1*              | Fission from CEL31 in deer lineage, followed by ~36Mb inversion. †                                                                                                                                                 |
| 20                       | 3                | 1*              |                                                                                                                                                                                                                    |
| 21                       | 14               | 9               |                                                                                                                                                                                                                    |
| 22                       | 5                | 3               | Fission from CEL3 in deer lineage. †                                                                                                                                                                               |
| 23                       | 13               | 13              | ~5.9Mb inversion in cattle lineage.                                                                                                                                                                                |
| 24                       | 22               | 19              |                                                                                                                                                                                                                    |
| 25                       | 20               | 16              |                                                                                                                                                                                                                    |
| 26                       | 9                | 8               | Fission from CEL28 in deer lineage. †                                                                                                                                                                              |
| 27                       | 24               | 23              |                                                                                                                                                                                                                    |
| 28                       | 9                | 8, 9*           | Fission from CEL26 in deer lineage.                                                                                                                                                                                |
| 29                       | 8                | 2*              | Fission from CEL16 in deer lineage.                                                                                                                                                                                |
| 30                       | 12               | 10              |                                                                                                                                                                                                                    |
| 31                       | 1                | 1*              | Fission from CEL19 in deer lineage.                                                                                                                                                                                |
| 32                       | 27               | 26              |                                                                                                                                                                                                                    |
| 33                       | 2                | 2*              | Fission from CEL8 in deer lineage.                                                                                                                                                                                 |
| 34 (X)                   | X                | X               | Three possible translocations (two in deer, one in cattle) and one possible ~18Mb inversion in cattle lineage; see Figure S5.                                                                                      |

\* Sheep chromosomes OAR1, OAR2 and OAR3 are fusions of BTA1 & BTA3, BTA2 & BTA8, BTA5 & BTA11, respectively. OAR9 has a translocation from its homologue of BTA9 to its homologue of BTA14.

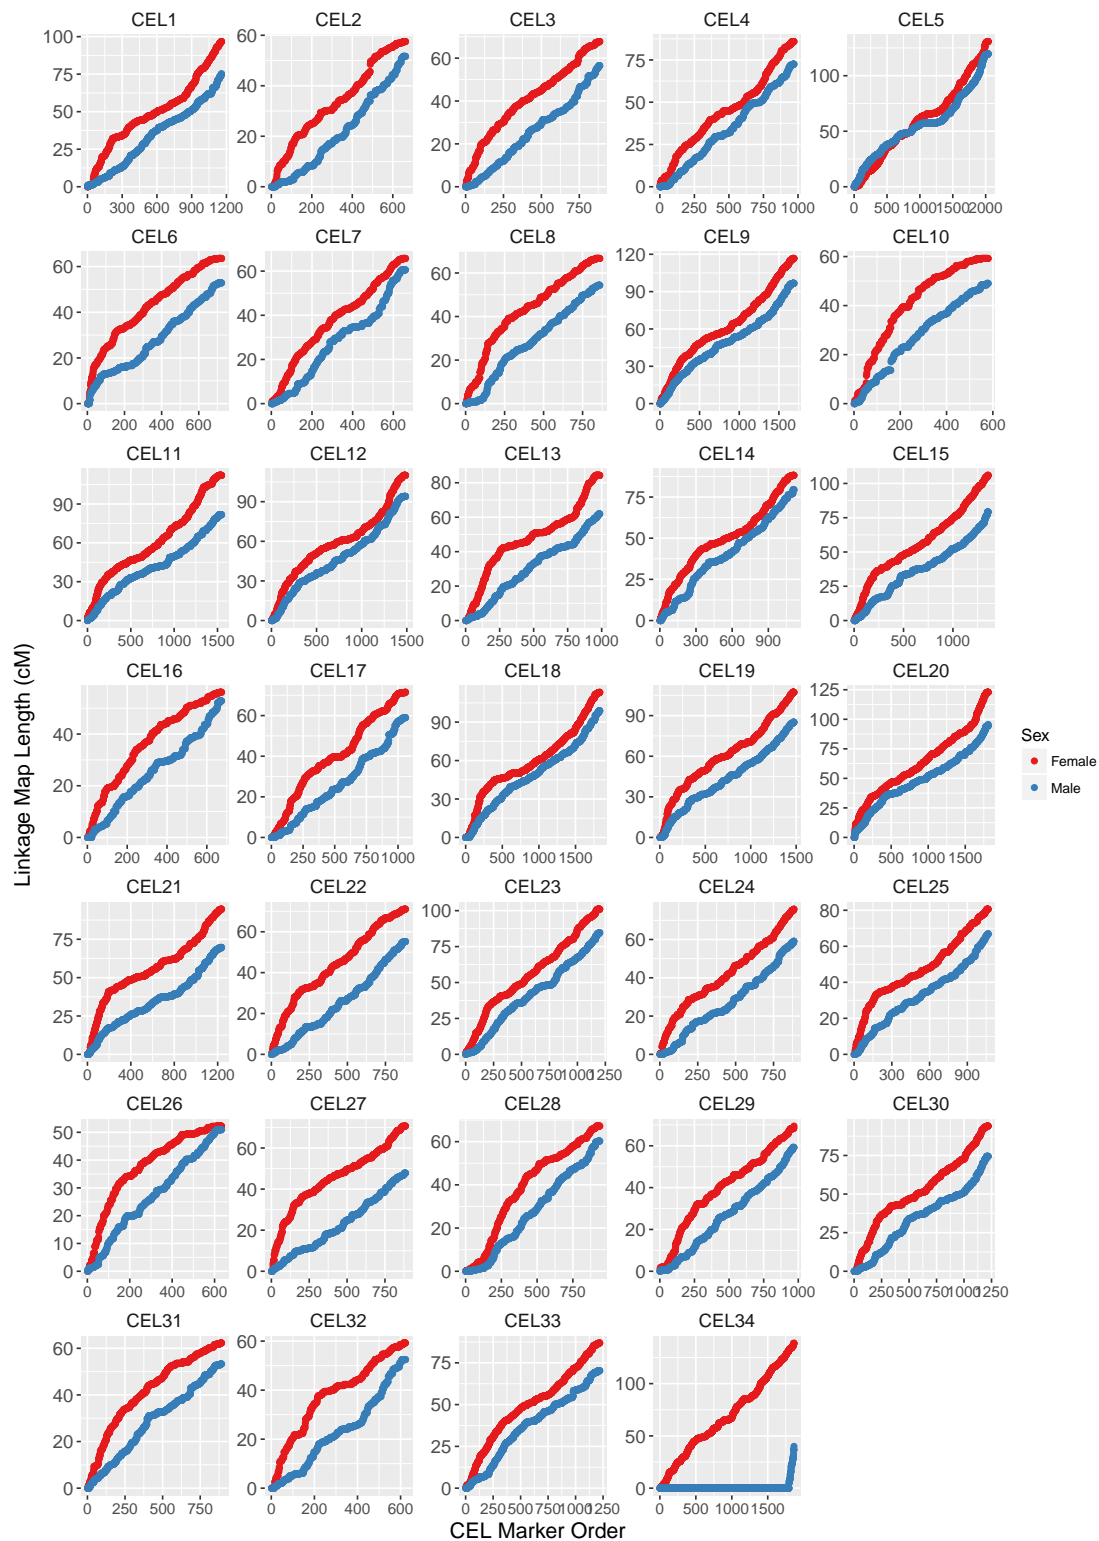

**Figure 2:** Sex-specific linkage maps for *Cervus elaphus* (CEL) linkage groups after Build 5. Map data is provided in Tables 1, 2 and S1. CEL34 corresponds to the X chromosome; the short map segment in male deer indicates the pseudoautosomal region (PAR).

## 301 Results

### 302 Linkage map.

303 The predicted sex-averaged red deer linkage map contained 38,083 SNP markers over 33  
304 autosomes and the X chromosome (Figure 2; Full map provided in Table S1), and had a sex-  
305 averaged length of 2739.7cM (Table 2). A total of 71.6% of intra-marker recombination fractions  
306 were zero, and so a skeleton map of 10,835 SNPs separated by at least one meiotic crossover  
307 was also characterised (Table S1). The female autosomal map was 1.21 times longer than  
308 in males (2767.4 cM and 2280.8 cM, respectively, Table 2). In the autosomes, we observed  
309 six chromosomal fissions, one fusion and two large and formerly uncharacterised inversions  
310 occurring in the deer lineage (Table 1, Figure S3). Otherwise, the deer map order generally  
311 conformed to the cattle map order. The X chromosome had undergone the most differentiation  
312 from cattle, with evidence of three translocations, including two in the deer lineage and one in  
313 the cattle lineage, and one inversion in the cattle lineage (Figure S5, Table S2), although we  
314 cannot rule out that this observation is a result of poor assembly of the cattle genome (Zimin  
315 *et al.*, 2009). The estimated positions of 90 unmapped markers are provided in Table S4. The  
316 BLAST results for determining lineage of origin are provided in Table S5.

### 317 Variation in recombination rate and landscape.

318 There was a linear relationship between estimated chromosome length and sex-averaged link-  
319 age map lengths (Adjusted  $R^2 = 0.961$ , Figure 3A). Smaller chromosomes had higher recom-  
320 bination rates (cM/Mb, Adjusted  $R^2 = 0.387$ , Figure 3B), which is likely to be a result of obligate  
321 crossing over. Female linkage maps were consistently longer than male linkage maps across  
322 all autosomes (Adjusted  $R^2 = 0.907$ , Figures S11) and correlations between estimated map  
323 lengths and linkage map lengths were similar in males and females (Adjusted  $R^2 = 0.910$  and  
324  $0.954$ , respectively; Figure S12). There was no significant difference between the true and  
325 sampled map lengths in males and females (Figure S13), suggesting that the data structure did  
326 not introduce bias in estimating sex-specific map lengths.

**Table 2:** Marker numbers and sex-averaged and sex-specific map lengths for each deer linkage group in Build 5. The estimated length (Mb) of each linkage group is calculated based on homologous SNP positions on the cattle genome BTA vUMD 3.0 and the sheep genome Oar\_v3.1.

| Deer Linkage Group (CEL) | Number of Loci | Estimated Length (Mb) | Sex-averaged map length (cM) | Male map length (cM) | Female map length (cM) |
|--------------------------|----------------|-----------------------|------------------------------|----------------------|------------------------|
| 1                        | 1158           | 82.7                  | 88.7                         | 75.2                 | 96.7                   |
| 2                        | 663            | 50.3                  | 55.4                         | 51.6                 | 57.5                   |
| 3                        | 885            | 57.7                  | 63.8                         | 56.5                 | 67.8                   |
| 4                        | 971            | 65.2                  | 81.3                         | 72.5                 | 85.9                   |
| 5                        | 2039           | 137.9                 | 126.8                        | 119.7                | 130.8                  |
| 6                        | 723            | 52.6                  | 59.6                         | 52.8                 | 63.5                   |
| 7                        | 660            | 51.7                  | 64                           | 60.6                 | 65.7                   |
| 8                        | 860            | 58                    | 62.1                         | 54.4                 | 66.7                   |
| 9                        | 1690           | 111.8                 | 109.4                        | 96.7                 | 116.7                  |
| 10                       | 580            | 42.7                  | 55.3                         | 49.1                 | 59.2                   |
| 11                       | 1547           | 107.1                 | 101.3                        | 81.7                 | 112.1                  |
| 12                       | 1486           | 102.1                 | 104.2                        | 94                   | 110                    |
| 13                       | 986            | 69.8                  | 76.3                         | 61.9                 | 84.3                   |
| 14                       | 1113           | 82.2                  | 85                           | 79.4                 | 88.2                   |
| 15                       | 1357           | 96.4                  | 96.4                         | 79.2                 | 105.9                  |
| 16                       | 674            | 47                    | 54.8                         | 52.8                 | 56.2                   |
| 17                       | 1059           | 68.3                  | 67                           | 59                   | 71.5                   |
| 18                       | 1831           | 120.7                 | 108                          | 98.8                 | 113.3                  |
| 19                       | 1476           | 101.9                 | 99.3                         | 85.1                 | 107.3                  |
| 20                       | 1810           | 118.6                 | 112.9                        | 95.6                 | 122.9                  |
| 21                       | 1236           | 84.1                  | 85.5                         | 69.7                 | 94.6                   |
| 22                       | 882            | 62.3                  | 65.2                         | 55.2                 | 71.1                   |
| 23                       | 1200           | 83.3                  | 95.1                         | 84.6                 | 101.1                  |
| 24                       | 885            | 61.3                  | 69.7                         | 59.1                 | 75.9                   |
| 25                       | 1066           | 72.1                  | 76                           | 66.9                 | 80.6                   |
| 26                       | 633            | 41.7                  | 51.7                         | 50.9                 | 52.2                   |
| 27                       | 886            | 62.5                  | 62.2                         | 47.8                 | 70.7                   |
| 28                       | 938            | 65.5                  | 64.7                         | 60.3                 | 67.2                   |
| 29                       | 969            | 67.2                  | 65.9                         | 59.2                 | 69.4                   |
| 30                       | 1220           | 86.2                  | 86.9                         | 74.4                 | 94                     |
| 31                       | 892            | 57.7                  | 59.1                         | 53.3                 | 62.3                   |
| 32                       | 623            | 46.7                  | 56.7                         | 52.5                 | 59.2                   |
| 33                       | 1220           | 80.4                  | 80.8                         | 70.3                 | 86.9                   |
| 34                       | 1865           | 148.2                 | 148.7                        | 40                   | 138.9                  |
| All                      | 38083          | 2644.1                | 2739.7                       | 2320.8               | 2906.3                 |
| All autosomal            | 36218          | 2495.7                | 2591.1                       | 2280.8               | 2767.4                 |

327 Fine-scale variation in recombination rate across chromosomes was calculated in 1Mb windows  
328 across the genome; recombination rate was considerably higher in females in the first ~20%  
329 of the chromosome, where the centromere is likely to be situated (Figure 4). This effect was  
330 consistent across nearly all autosomes (Figure 5). Male and female recombination rates were  
331 not significantly different across the rest of the chromosome, although male recombination was



332 marginally higher than females in sub-telomeric regions (i.e. where the centromere was absent;  
333 Figure 4). Both sexes showed reduced recombination in sub-telomeric regions - this effect is  
334 likely to be genuine and not due to reduced ability to infer crossovers within these regions, as  
335 the number of phase informative loci at these loci did not differ from the rest of the chromo-  
336 some (Figure S14). It should be noted that in some chromosomes, female recombination rates  
337 dropped sharply in the first window of the chromosome (Figure 5), indicating that recombination  
338 rates are likely to be very low in close proximity to the centromere.

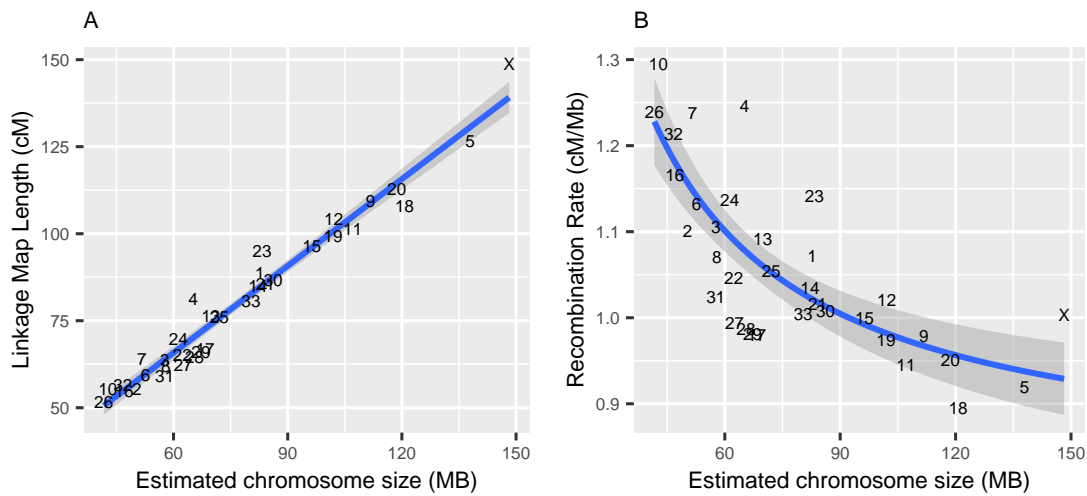

**Figure 3:** Broad-scale variation in recombination rate, showing correlations between (A) sex-averaged linkage map length (cM) and estimated chromosome length (Mb) and (B) estimated chromosome length (Mb) and chromosomal recombination rate (cM/Mb). Points are chromosome numbers, and lines and the grey-shaded areas indicate the regression slopes and standard errors, respectively.

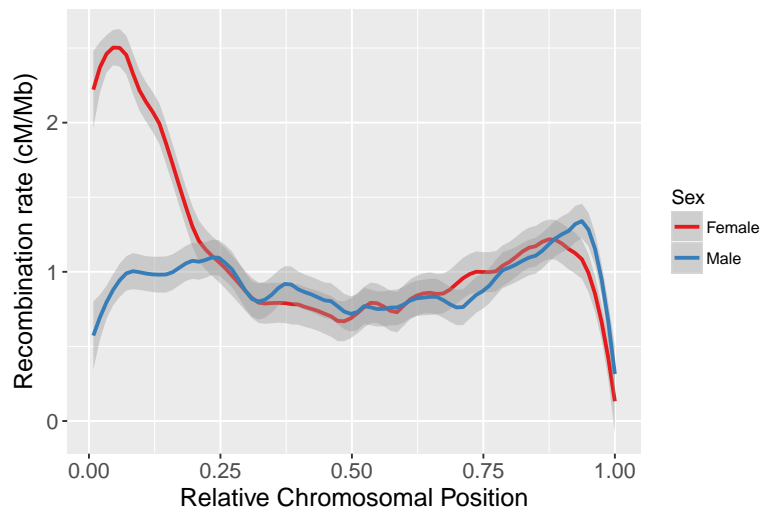

**Figure 4:** Loess smoothed splines of recombination rates across 32 acrocentric autosomes for males and females with a span parameter of 0.15. The centromere is assumed to be at the beginning of the chromosome. Splines for individual chromosomes are shown in Figure 5.

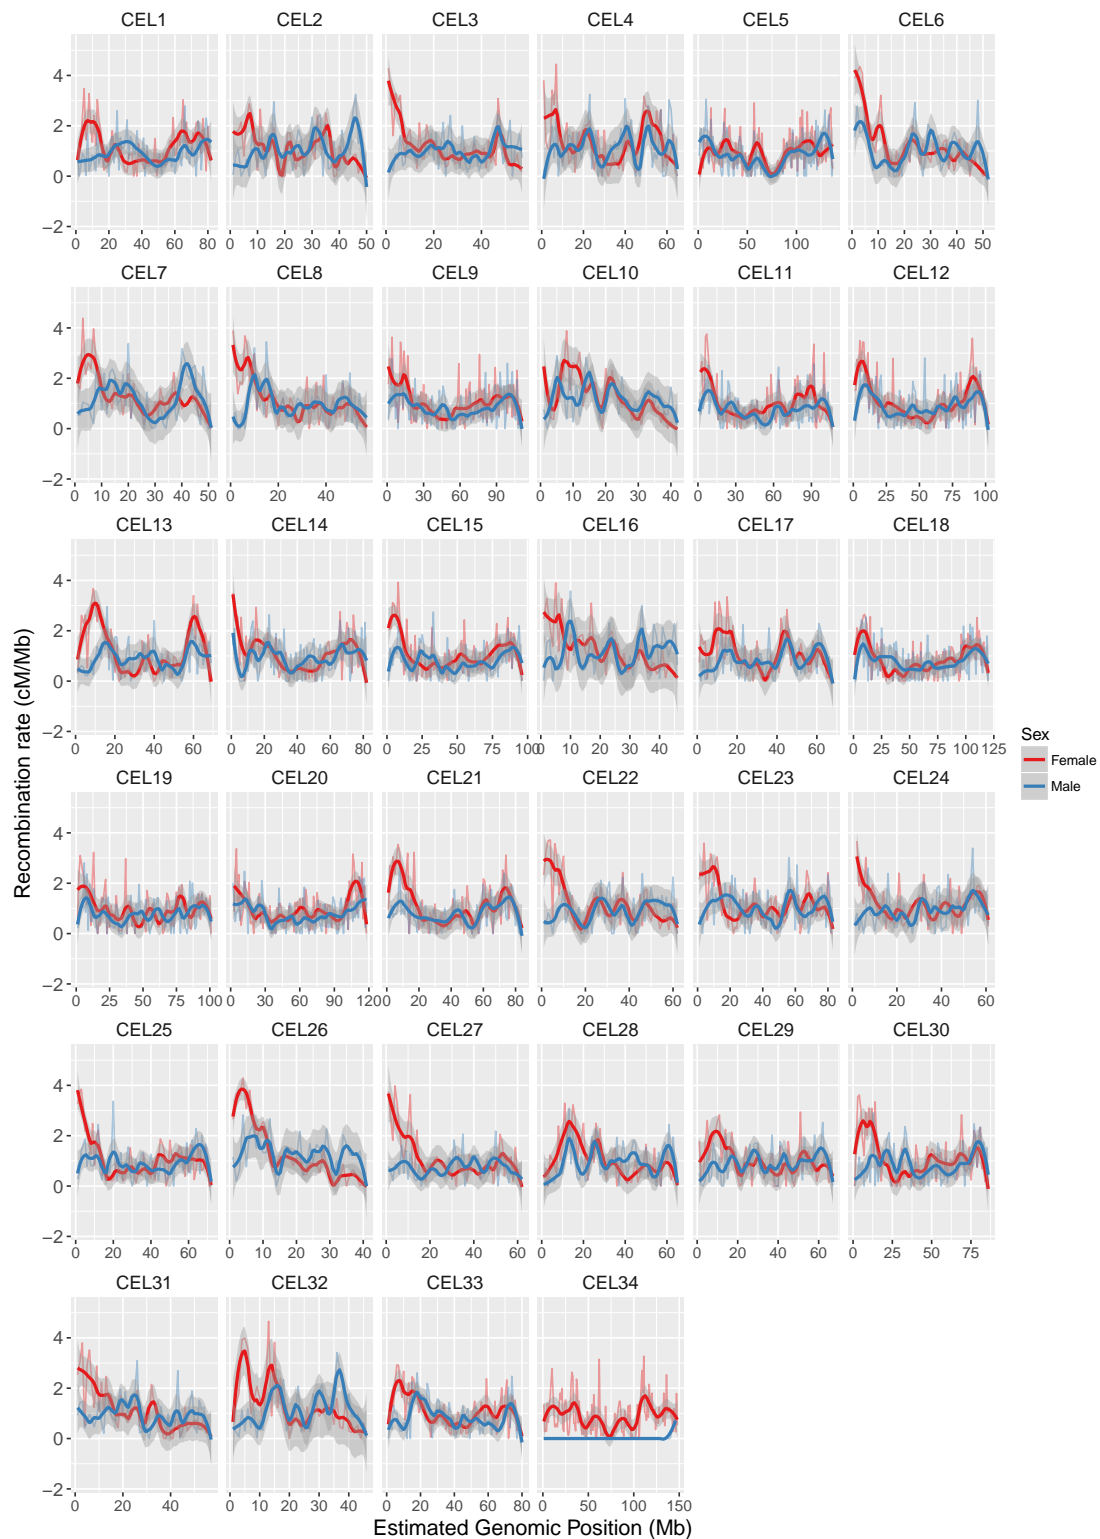

**Figure 5:** Loess smoothed splines of recombination rates in 1Mb windows across 33 autosomes for males and females with a span parameter of 0.2. All chromosomes are acrocentric with the centromere at the beginning of the chromosome (Gustavsson and Sundt, 1968), with the likely exception of CEL5. CEL34 is the X chromosome, with the pseudoautosomal region at the telomere end.

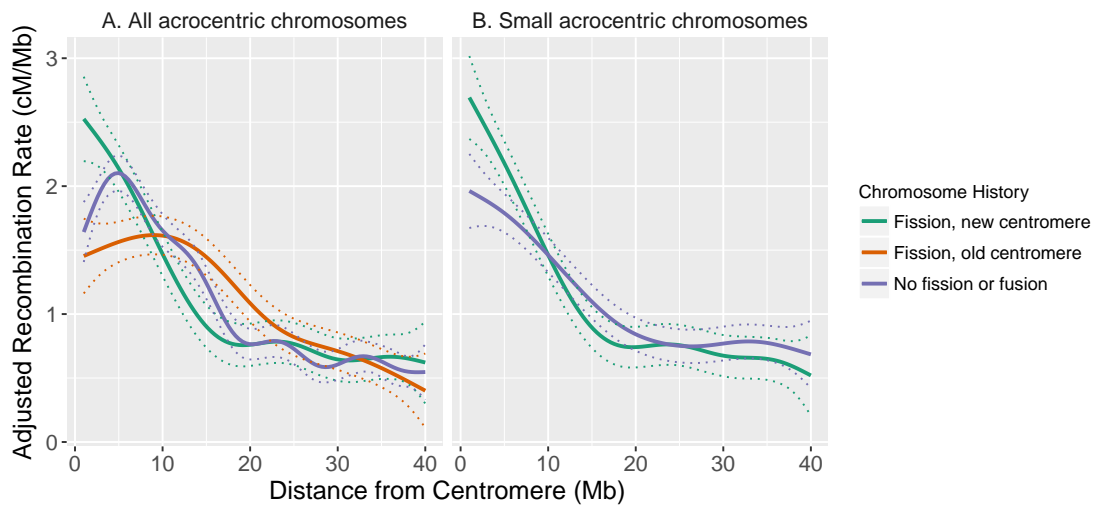

**Figure 6:** General additive model curves of adjusted recombination rate in females ( $k = 10$ ). A. All acrocentric chromosomes, including fission chromosomes forming a new centromere ( $n = 6$ ), fission chromosomes retaining the existing centromere ( $n = 6$ ) and chromosomes with no fission or fusion ( $n = 20$ ). B. Small acrocentric chromosomes, including fission chromosomes forming a new centromere ( $n = 5$ ) and chromosomes with no fission or fusion ( $n = 6$ ). Dashed lines indicate the standard errors. Recombination rates were adjusted for chromosome length (see main text).

339 General additive models of recombination rate variation in acrocentric chromosomes indicated  
340 that female recombination rates at the closest proximity to the centromere were higher in fission  
341 chromosomes that would have had to have formed a new centromere (Figure 6A); this result  
342 held when one or two chromosomes were removed (not shown), and when considering small  
343 chromosomes only (Figure 6B). There were no differences in recombination rates in males  
344 with differences in chromosome history (Figure S15). There was no evidence of differences  
345 in transmission distortion with chromosome history in closest proximity to the centromeres in  
346 either sex, although there were subtle differences 5-6Mb from the centromere ( $P < 0.05$ , Figure  
347 S16); full per-locus results are provided in Table S6.

## 348 Discussion

349 In this study, we constructed predicted and skeleton linkage maps for a wild population of  
350 red deer, containing 38,083 and 10,835 SNPs, respectively. Females had higher recombi-  
351 nation rates than males, which was driven by significantly higher recombination rates in peri-  
352 centromeric regions. These rates were unusually high compared to other mammal species such

353 as cattle, sheep and humans (Ma *et al.*, 2015; Johnston *et al.*, 2016; Kong *et al.*, 2010), and  
354 the effect was more pronounced in fission chromosomes that have formed centromeres more  
355 recently in their history. Here, we discuss issues related to the map assembly and utility, before  
356 proposing two explanations to explain strong heterochiasmy in peri-centromeric regions: (1)  
357 that this mechanism may have evolved to counteract centromeric drive associated with meiotic  
358 asymmetry in oocyte production; and/or (2) that sequence characteristics suppressing recom-  
359 bination in close proximity to the centromere may not have yet evolved at the neo-centromeres.

360 **Utility of the red deer linkage map.** The final predicted linkage map included 38,083 SNPs,  
361 accounting for 98.8% of polymorphic SNPs within this population. Whilst several large-scale  
362 rearrangements were identified in the red deer lineage (Table 1), marker orders generally cor-  
363 responded strongly to the cattle genome order. We are confident that the maps presented here  
364 are highly accurate for the purposes of genetic analyses outlined in the introduction; however,  
365 we also acknowledge that some errors are likely to be present. The limited number of meioses  
366 characterised means that we cannot guarantee a correct marker order on the predicted map  
367 at the same centiMorgan map positions, meaning that some small rearrangements may be un-  
368 detected within the dataset. Furthermore, the use of the cattle genome to inform initial marker  
369 order may also introduce error in cases of local genome misassembly. Considering these is-  
370 sues, we recommend that the deer marker order is used to verify, rather than inform, any *de*  
371 *novo* sequence assembly in the red deer or related species.

372 **Mapping of the X chromosome (CEL34).** The X chromosome (CEL34) showed the highest  
373 level of rearrangement, including two translocations in the deer lineage, one of which was a  
374 small region in the pseudoautosomal region (PAR) remapped to the distal end of the chromo-  
375 some (Figure S5). However, some caution should be exerted in interpreting whether these  
376 rearrangements relative to other species are genuine, as it has been acknowledged that the  
377 X chromosome assembly in cattle is of poorer quality in comparison to the autosomes (Zimin  
378 *et al.*, 2009; Ma *et al.*, 2015). The X chromosome showed a similar pattern to the autosomes  
379 in the relationship between estimated chromosome length (Mb) and linkage map length (cM,  
380 Figure 3). This may seem counter-intuitive, as recombination rates in the X should be lower due  
381 to it spending one-third of its time in males, where meiotic crossovers only occur on the PAR.  
382 However, female map lengths were generally longer, and 64% of the meioses used to inform  
383 sex-averaged maps occurred in females; furthermore, the female-specific map showed that the

384 X conformed to the expected map length (Figure S12). Therefore, the linkage map length of  
385 the X is as expected; however, we acknowledge that some errors or inflation may be present on  
386 the X given that fewer informative meioses occur in non-PAR regions.

387 **Predicting centromere positioning on the deer linkage groups.** Cytogenetic studies have  
388 shown that deer chromosomes are acrocentric (i.e. the centromere is situated at one end of  
389 the chromosome), with the exception of one unknown metacentric autosome, which is one of  
390 the physically largest (Gustavsson and Sundt, 1968). Our results suggest that the strongest  
391 candidate is CEL5, which has undergone a fusion event in the deer lineage (Table 1). Unlike  
392 other autosomes, this linkage group shows strong concordance between males and female cM  
393 maps (Figure 2), elevated male recombination rate at the chromosome ends and reduced re-  
394 combination in a ~8Mb region that corresponds with the fusion site at the centromeric regions  
395 of BTA17 and BTA19 (Figure 5). On the acrocentric chromosomes, we have assumed that cen-  
396 tromeres are at the beginning of each linkage group, based on synteny of centromere positions  
397 with the cattle genome (Ma *et al.*, 2015). There is evidence that centromeres can change posi-  
398 tion on mammalian chromosomes (Carbone *et al.*, 2006; Graphodatsky *et al.*, 2011). However,  
399 the frequency of this is sufficiently low, and recombination patterns so consistent in our dataset  
400 (Figure 5) that we believe our assumption is justified, particularly for chromosomes that have not  
401 undergone fission or fusion events in either lineage (Table 1). Six of the fission chromosomes  
402 (CEL6, CEL8, CEL16, CEL19, CEL22 and CEL26) would have had to form new centromeres in  
403 the deer lineage. Direct orientation with the cattle genome shows similar patterns of recombina-  
404 tion to other chromosomes (Figure 5), indicating that telomeric regions have most likely not  
405 changed, and that centromeres have positioned themselves at the beginning of the chromo-  
406 somes. Nevertheless, we acknowledge that confirmation of centromeric positions will require  
407 further investigation.

408 **Sexual dimorphism in recombination landscape: a consequence of centromeric drive?**

409 Females had considerably higher recombination rates in peri-centromeric regions, resulting in  
410 female-biased recombination rates overall; recombination rates along the remainder of the chro-  
411 mosome were similar in both sexes, and lowest at the closest proximity to the telomere (Figure  
412 4). Sampling identical numbers of males and females with replacement confirmed that this  
413 observation is unlikely to be a result of differences in sample sizes between the sexes (Figure  
414 S13). Identifying female-biased heterochiasmy is not unusual, as recombination rates in placen-

415 tal mammals are generally higher in females, particularly towards the centromere (Lenormand  
416 and Dutheil, 2005; Brandvain and Coop, 2012). Nevertheless, the patterns of recombination  
417 rate variation observed in this dataset are striking for several reasons. First, our findings are  
418 distinct from the other ruminants, namely cattle and sheep, which both exhibit male-biased het-  
419 erochiasmy driven by elevated male recombination rates in sub-telomeric regions, with similar  
420 male and female recombination rates in peri-centromeric regions (Ma *et al.*, 2015; Johnston  
421 *et al.*, 2016). Indeed, all other mammal studies to date show increased male sub-telomeric  
422 recombination even if female recombination rates are higher overall (e.g. in humans and mice;  
423 Kong *et al.*, 2010; Liu *et al.*, 2014). Second, whilst female recombination rates tend to be rela-  
424 tively higher in peri-centromeric regions in many species, the degree of difference is relatively  
425 small compared to that observed in the deer, and is generally suppressed in very close proximity  
426 the centromere (Brandvain and Coop, 2012); in this study, we observed female recombination  
427 rates of 2-5 times that of males within this region.

428 There are several hypotheses proposed to explain increased recombination rates in female  
429 mammals (Brandvain and Coop, 2012). The most prevalent has been the idea that increased  
430 crossover number in females protects against aneuploidy (i.e. non-disjunction) after long peri-  
431 ods of meiotic arrest during Prophase I (Morelli and Cohen, 2005; Coop and Przeworski, 2007;  
432 Nagaoka *et al.*, 2012). While we cannot rule this out as a potential driver, this hypothesis  
433 dominates the human literature, where females have one of the longest meiotic arrests of any  
434 mammal (Burt and Bell, 1987). Female deer on Rum reach sexual maturity at a relatively  
435 young age (~1.5 - 2.5 years of age) compared to other mammals, such as monkeys and great  
436 apes, and similar to other ruminants such as sheep and cattle (Burt and Bell, 1987). A more  
437 compelling hypothesis relates to the role of meiotic drive, where asymmetry in meiotic cell divi-  
438 sions in females can be exploited by selfish genetic elements associated with the centromere  
439 (Brandvain and Coop, 2012 & Introduction), where higher female recombination at the peri-  
440 centromeric regions may counteract centromeric drive by increasing the uncertainty associated  
441 segregation into the egg (Haig and Grafen, 1991). In addition to a global mechanism driving  
442 local increases in recombination, our observation that chromosomes with newer centromeres  
443 show increased recombination in close proximity to the centromere may support this idea (Fig-  
444 ure 6). Whilst there is still generally little consensus on the mechanisms related to the formation  
445 of new centromeres (Rocchi *et al.*, 2011), conflict between centromeric proteins and repetitive  
446 centromeric DNA may lead to rapid evolution of centromere strength in a new or recently formed  
447 centromere (Rosin and Mellone, 2017). Increased recombination rates in close proximity to a



448 newer centromere could provide a mechanism to counter stronger drive.

449 However, there are alternative (but not exclusive) arguments to this in the current dataset. The  
450 first is that increased recombination on new centromere chromosomes may be because se-  
451 quence characteristics suppressing peri-centromeric recombination have not yet evolved in  
452 proximity to more recent centromeres. This is supported by our findings that there is no ev-  
453 idence of transmission distortion at centromeric regions on any of the chromosomes, although  
454 it also can be argued that centromeres have stabilised in the contemporary population, and that  
455 our current study cannot investigate historical differences in centromere strength. Additionally,  
456 the observed effect may be partially driven by mapping errors at the chromosome ends, partic-  
457 ularly if polymorphisms in close proximity to the centromere have not been characterised and/or  
458 mapped.

459 **Conclusions and future directions.** Our study has created a new linkage map resource for  
460 red deer and will facilitate genome-wide studies and genome assembly projects in red deer and  
461 related species. We have argued that increased recombination at peri-centromeric regions in  
462 females may be a mechanism to counteract meiotic drive; however, testing this hypothesis will  
463 require further investigation. Cytogenetic studies will allow confirmation of centromere posi-  
464 tioning, and will give insight into how and why chromatin and cohesin structure does/does not  
465 suppress recombination in the pericentromeric region, and how their dynamics vary across the  
466 deer lineage (Vincenten *et al.*, 2015). In addition, *de novo* genome assemblies have the po-  
467 tential to verify map orders where possible; sequencing multiple deer genomes will allow us to  
468 determine population-scale recombination rates and hotspots (Chan *et al.*, 2012), with the po-  
469 tential to investigate historical variation in rate based on signatures of biased gene conversion  
470 (Capra *et al.*, 2013).

## 471 **Acknowledgements**

472 We thank T. Clutton-Brock, F. Guinness, S. Albon, A. Morris, S. Morris, M. Baker and many oth-  
473 ers for collecting field data and DNA samples and their important contributions to the long-term  
474 Rum deer project. Discussions with C. Bérénos, J. Risse and M.D. Edge aided the study; we  
475 also appreciate discussion with G. Coop, T. Lenormand, L. Ross, D. Charlesworth, L. Ma and

476 many Twitter users (Y. Brandvain, L. Holman, A. Kern, A. Mason, T. Price and L. Theodosiou)  
477 on interpreting the pattern of high peri-centromeric recombination in females. We thank Scot-  
478 tish Natural Heritage for permission to work on the Isle of Rum National Nature Reserve, and  
479 the Wellcome Trust Clinical Research Facility Genetics Core in Edinburgh for performing the  
480 genotyping. This work has made extensive use of the resources provided by the University of  
481 Edinburgh Compute and Data Facility (<http://www.ecdf.ed.ac.uk/>). The long-term project Rum  
482 deer is funded by the UK Natural Environment Research Council, and SNP genotyping was  
483 supported by a European Research Council Advanced Grant to J.M.P. S.E.J. is supported by  
484 a Royal Society University Research Fellowship.

## 485 Author Contributions

486 J.M.P and J.H. organised the collection of samples. P.A.E. and J.H. conducted DNA sample  
487 extraction and genotyping. S.E.J. designed the study, analysed the data and wrote the paper.  
488 All authors contributed to revisions.

## 489 References

- 490 Aulchenko, Y. S., S. Ripke, A. Isaacs, and C. M. van Duijn, 2007 GenABEL: an R library for  
491 genome-wide association analysis. *Bioinformatics* **23**: 1294–1296.
- 492 Band, M. R., J. H. Larson, M. Rebeiz, C. A. Green, D. W. Heyen, *et al.*, 2000 An ordered  
493 comparative map of the cattle and human genomes. *Genome Res.* **10**: 1359–1368.
- 494 Béréanos, C., P. A. Ellis, J. G. Pilkington, S. H. Lee, J. Gratten, *et al.*, 2015 Heterogeneity of  
495 genetic architecture of body size traits in a free-living population. *Mol. Ecol.* **24**: 1810–1830.
- 496 Bradbury, I. R., S. Hubert, B. Higgins, S. Bowman, T. Borza, *et al.*, 2013 Genomic islands  
497 of divergence and their consequences for the resolution of spatial structure in an exploited  
498 marine fish. *Evol. Appl.* **6**: 450–461.
- 499 Brandvain, Y. and G. Coop, 2012 Scrambling eggs: meiotic drive and the evolution of female  
500 recombination rates. *Genetics* **190**: 709–23.

- 501 Brauning, R., P. J. Fisher, A. F. McCulloch, R. J. Smithies, J. F. Ward, *et al.*, 2015 Utilization  
502 of high throughput genome sequencing technology for large scale single nucleotide polymor-  
503 phism discovery in red deer and canadian elk. bioRxiv .
- 504 Brieuc, M. S. O., C. D. Waters, J. E. Seeb, and K. A. Naish, 2014 A dense linkage map for  
505 chinook salmon (*Oncorhynchus tshawytscha*) reveals variable chromosomal divergence after  
506 an ancestral whole genome duplication event. *G3 Genes Genom. Genet.* **4**: 447–460.
- 507 Burt, A., 2000 Sex, Recombination, and the Efficacy of Selection - was Weismann Right? *Evo-*  
508 *lution* **54**: 337–351.
- 509 Burt, A. and G. Bell, 1987 Mammalian chiasma frequencies as a test of two theories of recom-  
510 bination. *Nature* **326**: 803–805.
- 511 Camacho, C., G. Coulouris, V. Avagyan, N. Ma, J. Papadopoulos, *et al.*, 2009 BLAST+: archi-  
512 tecture and applications. *BMC Bioinf.* **10**: 1–9.
- 513 Capra, J. A., M. J. Hubisz, D. Kostka, K. S. Pollard, and A. Siepel, 2013 A model-based analysis  
514 of gc-biased gene conversion in the human and chimpanzee genomes. *PLOS Genetics* **9**: 1–  
515 15.
- 516 Carbone, L., S. G. Nergadze, E. Magnani, D. Misceo, M. F. Cardone, *et al.*, 2006 Evolutionary  
517 movement of centromeres in horse, donkey, and zebra. *Genomics* **87**: 777–782.
- 518 Chan, A. H., P. A. Jenkins, and Y. S. Song, 2012 Genome-wide fine-scale recombination rate  
519 variation in *Drosophila melanogaster*. *PLOS Genetics* **8**: 1–28.
- 520 Charlesworth, B. and N. H. Barton, 1996 Recombination load associated with selection for  
521 increased recombination. *Genet. Res.* **67**: 27–41.
- 522 Chmátal, L., S. Gabriel, G. Mitsainas, J. Martínez-Vargas, J. Ventura, *et al.*, 2014 Centromere  
523 strength provides the cell biological basis for meiotic drive and karyotype evolution in mice.  
524 *Current Biology* **24**: 2295 – 2300.
- 525 Clutton-Brock, T., F. Guinness, and S. Albon, 1982 *Red Deer. Behaviour and Ecology of Two*  
526 *Sexes.* University of Chicago Press.
- 527 Coop, G. and M. Przeworski, 2007 An evolutionary view of human recombination. *Nat Rev*  
528 *Genet* **8**: 23–34.

- 529 Ellegren, H., 2014 Genome sequencing and population genomics in non-model organisms.  
530 Trends Ecol. Evol. **29**: 51–63.
- 531 Felsenstein, J., 1974 The evolutionary advantage of recombination. Genetics **78**: 737–756.
- 532 Fierst, J. L., 2015 Using linkage maps to correct and scaffold de novo genome assemblies:  
533 methods, challenges, and computational tools. Front. Genet. **6**: 220.
- 534 Fledel-Alon, A., D. J. Wilson, K. Broman, X. Wen, C. Ober, *et al.*, 2009 Broad-scale recombina-  
535 tion patterns underlying proper disjunction in humans. PLoS Genet. **5**: e1000658.
- 536 Fountain, T., M. Ravinet, R. Naylor, K. Reinhardt, and R. K. Butlin, 2016 A linkage map and  
537 QTL analysis for pyrethroid resistance in the bed bug *Cimex lectularius*. G3 Genes Genom.  
538 Genet. **6**: 4059–4066.
- 539 Frantz, A. C., J. T. Pourtois, M. Heuertz, L. Schley, M. C. Flamand, *et al.*, 2006 Genetic structure  
540 and assignment tests demonstrate illegal translocation of red deer (*Cervus elaphus*) into a  
541 continuous population. Mol. Ecol. **15**: 3191–3203.
- 542 Graphodatsky, A. S., V. A. Trifonov, and R. Stanyon, 2011 The genome diversity and karyotype  
543 evolution of mammals. Mol. Cytogenet. **4**: 22.
- 544 Green, P., K. Falls, and S. Crooks, 1990 *Documentation for CRIMAP, version 2.4*. Washington  
545 University School of Medicine.
- 546 Gustavsson, I. and C. O. Sundt, 1968 Karyotypes in five species of deer (*Alces alces* L., *Capreo-*  
547 *lus capreolus* L., *Cervus elaphus* L., *Cervus nippon nippon* temm. and *Dama dama* L.). Hered-  
548 itas **60**: 233–248.
- 549 Haig, D. and A. Grafen, 1991 Genetic scrambling as a defence against meiotic drive. J. Theor.  
550 Biol. **153**: 531–558.
- 551 Hassold, T. and P. Hunt, 2001 To err (meiotically) is human: the genesis of human aneuploidy.  
552 Nat. Rev. Genet. **2**: 280–291.
- 553 Hedges, S. B., J. Marin, M. Suleski, M. Paymer, and S. Kumar, 2015 Tree of life reveals clock-like  
554 speciation and diversification. Mol. Biol. Evol. **32**: 835–845.
- 555 Huisman, J., 2017 Pedigree reconstruction for SNP data: parentage assignment, sibship clus-  
556 tering and beyond. Mol. Ecol. Resour. **In press**.

- 557 Huisman, J., L. E. B. Kruuk, P. A. Ellis, T. Clutton-Brock, and J. M. Pemberton, 2016 Inbreeding  
558 depression across the lifespan in a wild mammal population. *Proc. Natl. Acad. Sci. U.S.A.*  
559 **113**: 3585–3590.
- 560 Johnston, S. E., C. Bérénos, J. Slate, and J. M. Pemberton, 2016 Conserved genetic archi-  
561 tecture underlying individual recombination rate variation in a wild population of soay sheep  
562 (*ovis aries*). *Genetics* **203**: 583–598.
- 563 Kardos, M., H. R. Taylor, H. Ellegren, G. Luikart, and F. W. Allendorf, 2016 Genomics advances  
564 the study of inbreeding depression in the wild. *Evol. Appl.* **9**: 1205–1218.
- 565 Kawakami, T., L. Smeds, N. Backström, A. Husby, A. Qvarnström, *et al.*, 2014 A high-density  
566 linkage map enables a second-generation collared flycatcher genome assembly and reveals  
567 the patterns of avian recombination rate variation and chromosomal evolution. *Mol. Ecol.* **23**:  
568 4035–4058.
- 569 Kong, A., G. Thorleifsson, D. F. Gudbjartsson, G. Masson, A. Sigurdsson, *et al.*, 2010 Fine-  
570 scale recombination rate differences between sexes, populations and individuals. *Nature* **467**:  
571 1099–1103.
- 572 Kruuk, L. E. B., J. Slate, J. M. Pemberton, S. Brotherstone, F. Guinness, *et al.*, 2002 Antler size  
573 in red deer: heritability and selection but no evolution. *Evolution* **56**: 1683–1695.
- 574 Lander, E. S. and N. J. Schork, 1994 Genetic dissection of complex traits. *Science* **265**: 5181.
- 575 Leitwein, M., B. Guinand, J. Pouzadoux, E. Desmarais, P. Berrebi, *et al.*, 2016 A dense brown  
576 trout (*Salmo trutta*) linkage map reveals recent chromosomal rearrangements in the salmo  
577 genus and the impact of selection on linked neutral diversity. *bioRxiv* .
- 578 Lenormand, T. and J. Dutheil, 2005 Recombination difference between sexes: a role for haploid  
579 selection. *PLoS Biol.* **3**: e63.
- 580 Liu, E. Y., A. P. Morgan, E. J. Chesler, W. Wang, G. A. Churchill, *et al.*, 2014 High-resolution  
581 sex-specific linkage maps of the mouse reveal polarized distribution of crossovers in male  
582 germline. *Genetics* **197**: 91–106.
- 583 Ma, L., J. R. O’Connell, P. M. VanRaden, B. Shen, A. Padhi, *et al.*, 2015 Cattle Sex-Specific  
584 Recombination and Genetic Control from a Large Pedigree Analysis. *PLoS Genet.* **11**:  
585 e1005387.

- 586 Mank, J. E., 2009 The evolution of heterochiasmy: the role of sexual selection and sperm  
587 competition in determining sex-specific recombination rates in eutherian mammals. *Genet.*  
588 *Res.* **91**: 355–363.
- 589 McKinney, G. J., L. W. Seeb, W. A. Larson, D. Gomez-Uchida, M. T. Limborg, *et al.*, 2016  
590 An integrated linkage map reveals candidate genes underlying adaptive variation in chinook  
591 salmon (*Oncorhynchus tshawytscha*). *Mol. Ecol. Resour.* **16**: 769–783.
- 592 Morelli, M. A. and P. E. Cohen, 2005 Not all germ cells are created equal: Aspects of sexual  
593 dimorphism in mammalian meiosis. *Reproduction* **130**: 761–781.
- 594 Muller, H., 1964 The relation of recombination to mutational advance. *Mutat. Res.* **1**: 2–9.
- 595 Nagaoka, S. I., T. J. Hassold, and P. A. Hunt, 2012 Human aneuploidy: mechanisms and new  
596 insights into an age-old problem. *Nat. Rev. Genet.* **13**: 493–504.
- 597 Pardo-Manuel De Villena, F. and C. Sapienza, 2001 Female Meiosis Drives Karyotypic Evolution  
598 in Mammals. *Genetics* **159**: 1179–1189.
- 599 Phadnis, N., R. W. Hyppa, and G. R. Smith, 2011 New and old ways to control meiotic recom-  
600 bination. *Trends Genet.* **27**: 411 – 421.
- 601 Rastas, P., F. C. F. Calboli, B. Guo, T. Shikano, and J. Merilä, 2016 Construction of ultradense  
602 linkage maps with Lep-MAP2: Stickleback F2 recombinant crosses as an example. *Genome*  
603 *Biol. Evol.* **8**: 78–93.
- 604 Rocchi, M., N. Archidiacono, W. Schempp, O. Capozzi, and R. Stanyon, 2011 Centromere  
605 repositioning in mammals. *Heredity* **108**: 59–67.
- 606 Rosin, L. F. and B. G. Mellone, 2017 Centromeres drive a hard bargain. *Trends in Genetics* **33**:  
607 101 – 117.
- 608 Senn, H. V. and J. M. Pemberton, 2009 Variable extent of hybridization between invasive sika  
609 (*Cervus nippon*) and native red deer (*C. elaphus*) in a small geographical area. *Mol. Ecol.* **18**:  
610 862–876.
- 611 Slate, J., T. C. Van Stijn, R. M. Anderson, K. M. McEwan, N. J. Maqbool, *et al.*, 2002 A deer  
612 (subfamily *Cervinae*) genetic linkage map and the evolution of ruminant genomes. *Genetics*  
613 **160**: 1587–1597.

- 614 Smukowski, C. S. and M. A. F. Noor, 2011 Recombination rate variation in closely related  
615 species. *Heredity* **107**: 496–508.
- 616 Stapley, J., T. R. Birkhead, T. Burke, and J. Slate, 2008 A linkage map of the zebra finch *Taeniopygia guttata* provides new insights into avian genome evolution. *Genetics* **179**: 651–667.
- 618 Sturtevant, A. H., 1913 The linear arrangement of six sex-linked factors in *Drosophila*, as shown  
619 by their mode of association. *J. Exp. Zool.* **14**: 43–59.
- 620 Trivers, R., 1988 Sex differences in rates of recombination and sexual selection. In *The Evolution of Sex*, edited by R. Michod and B. Levin, pp. 270–286, Sinauer Press.
- 622 Vincenten, N., L.-M. Kuhl, I. Lam, A. Oke, A. R. Kerr, *et al.*, 2015 The kinetochore prevents  
623 centromere-proximal crossover recombination during meiosis. *eLife* **4**: e10850.
- 624 Wood, S. N., 2011 Fast stable restricted maximum likelihood and marginal likelihood estimation  
625 of semiparametric generalized linear models. *Journal of the Royal Statistical Society: Series*  
626 *B (Statistical Methodology)* **73**: 3–36.
- 627 Zimin, A. V., A. L. Delcher, L. Florea, D. R. Kelley, M. C. Schatz, *et al.*, 2009 A whole-genome  
628 assembly of the domestic cow, *Bos taurus*. *Genome Biol.* **10**: R42.
